# Supplementary material
Source: Frontiers journal article supplement (https://www.frontiersin.org/articles/269319)
Supplement: Table_1.pdf [file Table_1.pdf]

| Developmental Stages of Comparison |                       |           |
|------------------------------------|-----------------------|-----------|
| Rat (Purdue-Wistar)                | Mouse (Swiss Webster) |           |
| Actual                             | Approximate           | Converted |
| E9.6 (approx.)                     | E8.5                  | E8.5      |
| E10.8 (approx.)                    | E9.5                  | E9.5      |
| E11                                | E10.0                 | E9.75     |
| E12                                | E10.5                 | E10.5     |
| E13                                | E11.5                 | E11.5     |
| E14                                | E12.0                 | E12.3     |
| E15                                | E13.0                 | E13.2     |
| E16                                | E14.0                 | E14.1     |
| E17                                | E15.0                 | E15.0     |
| E18                                | E16.0                 | E15.9     |
| E19                                | E16.5                 | E16.7     |
| E20                                | E17.5                 | E17.6     |
| E21                                | E18.5                 | E18.5     |

**Supplemental Table 1.** Comparison of developmental stages in rats and mice. The gestational period of Purdue-Wistar rats is 21d (Altman and Bayer, 1981). In contrast, Swiss Webster mice used for lineage mapping in this study have a gestational period of 18.5 days (based on breeding Swiss Webster Mice in Zervas lab over seven years (Approximate). Thus, there is a 1.135d difference between Purdue-Wistar rats and Swiss Webster mice. We used 1.135 to convert rat gestational stages to mouse stages (Converted) and then rounded to the nearest 0.5 day to generate an approximate equivalent age in mice. The conversion is used in the discussion of the manuscript to compare stages of development in classic birthdating and our fate mapping results.
